# Supplementary material for: Prevalence of allergen-specific IgE in southern China: a multicenter research
Source: publisher site journal article supplement (doi:10.18632/aging.203341), 2021-07-22
Supplement: Supplementary file [file aging-v13i14-203341-supplementary-material-SD1.pdf]

## SUPPLEMENTARY FIGURES

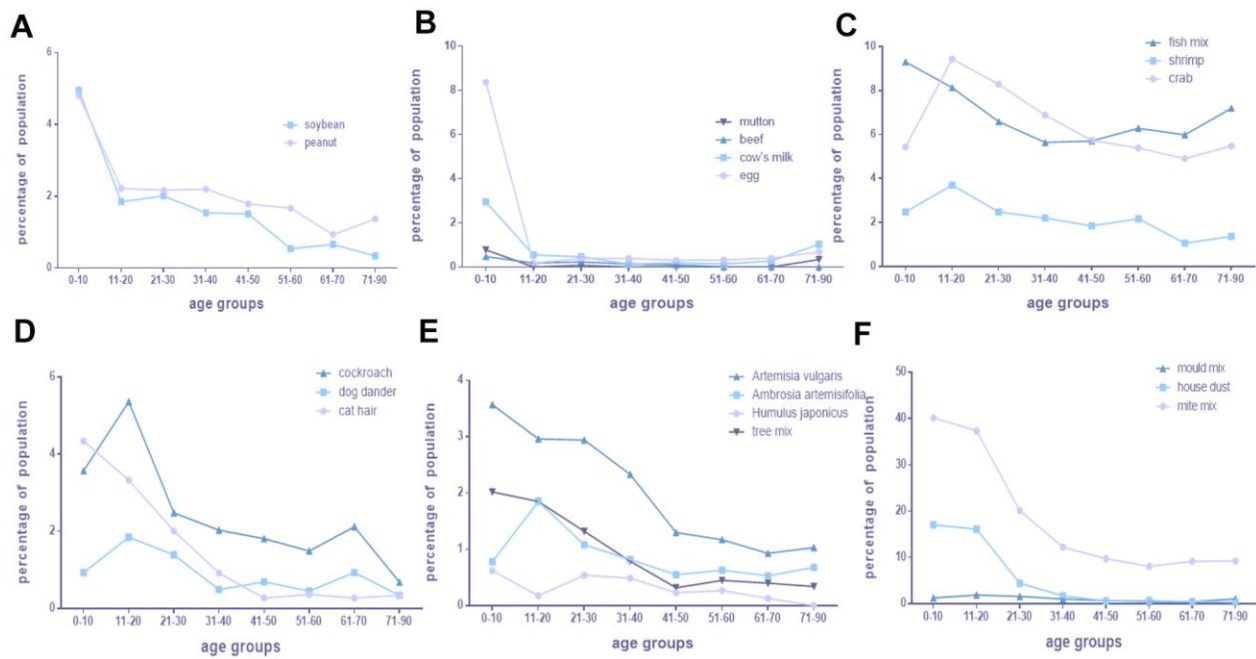

**Supplementary Figure 1. The difference of the positive rate of various allergens in different age groups in Chengdu. (A–C) Food allergens. (D–F) Aeroallergens.**

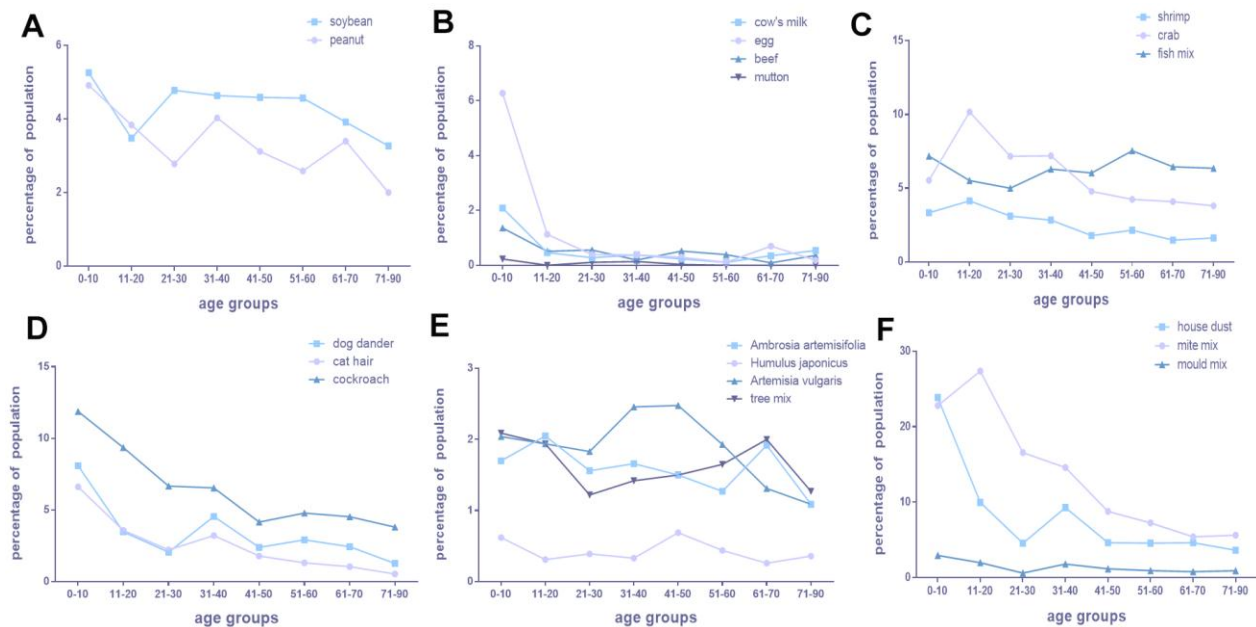

**Supplementary Figure 2. The difference of the positive rate of various allergens in different age groups in Chongqing. (A–C) Food allergens. (D–F) Aeroallergens.**

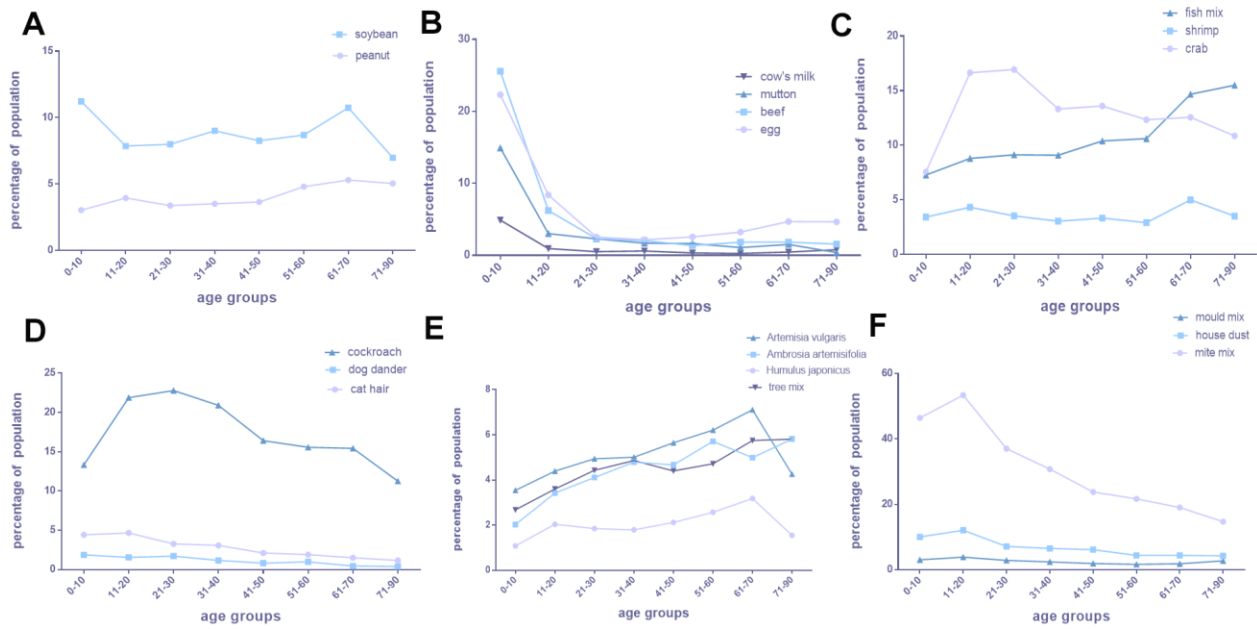

**Supplementary Figure 3. The difference of the positive rate of various allergens in different age groups in Liuzhou. (A–C) Food allergens. (D–F) Aeroallergens.**

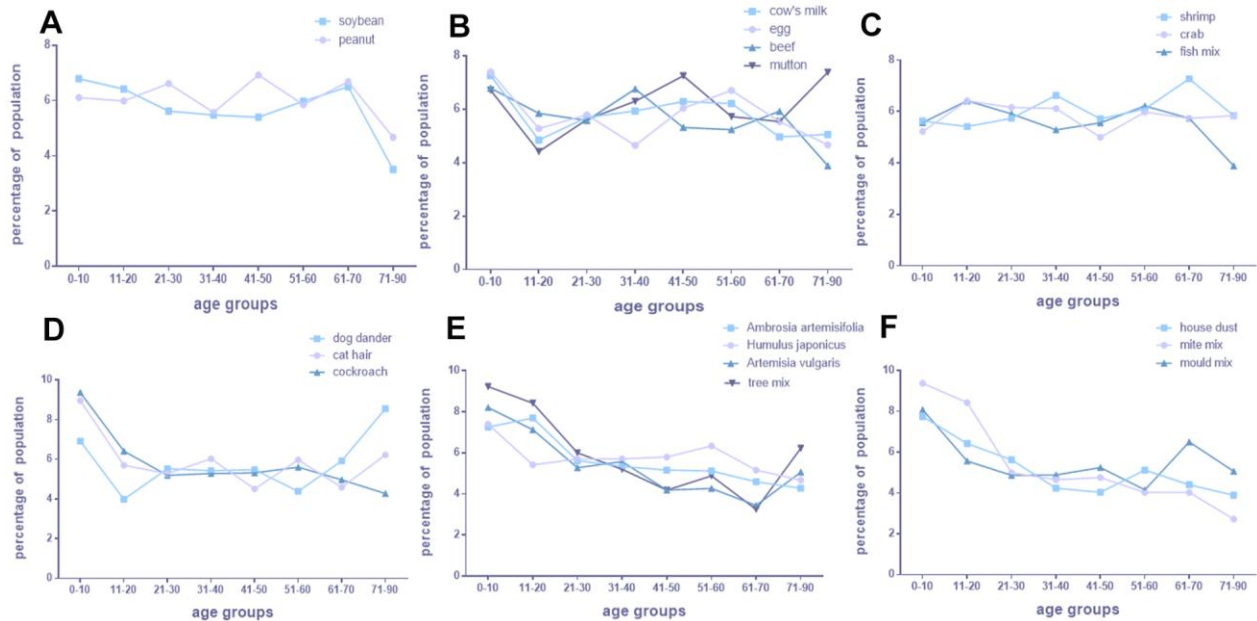

**Supplementary Figure 4. The difference of the positive rate of various allergens in different age groups in Shenzhen. (A–C) Food allergens. (D–F) Aeroallergens.**

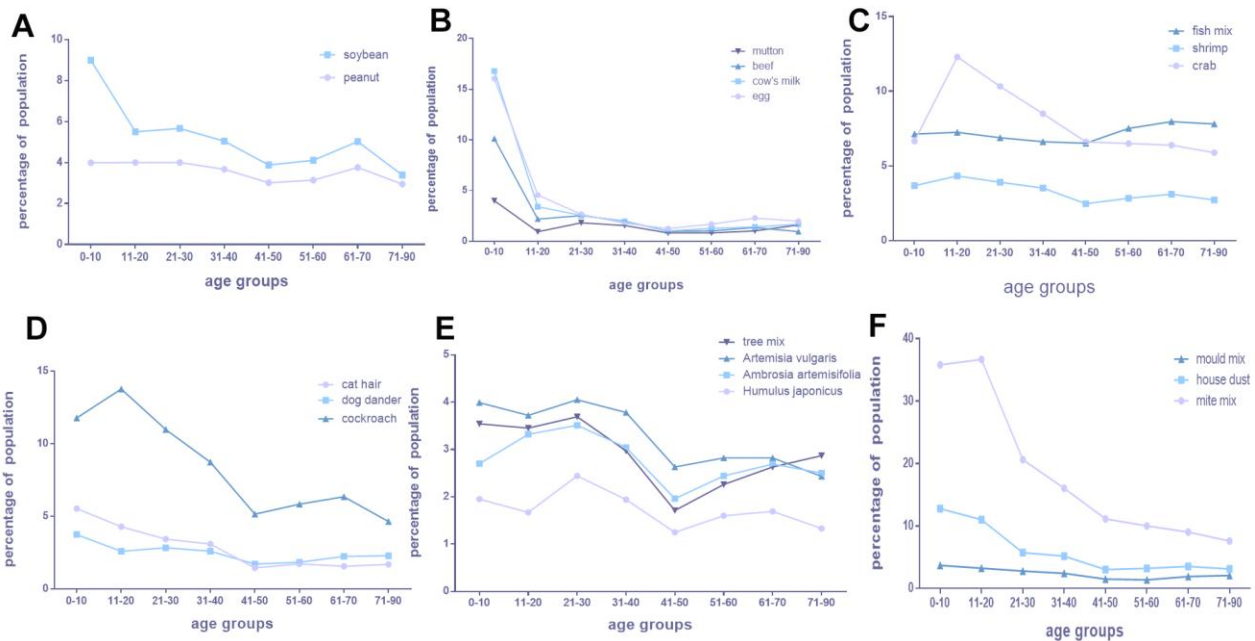

**Supplementary Figure 5. The difference of the positive rate of various allergens in different age groups overall these four cities. (A–C) Food allergens. (D–F) Aeroallergens.**
